# Supplementary material
Source: Research Square preprint supplement (doi:10.21203/rs.3.rs-9563995/v1)
Supplement: Supplementary file 1 [file f05550fdb0d927f93cf0596f.docx]

**Supplementary table 1 MOAA/S score at each observation time points.**

| **MOAA/S score, n (%)** | Propofol  (n = 183) | Etomidate & propofol  (n = 182) | P value |
| --- | --- | --- | --- |
| Baseline |  |  |  |
| 5 | 183 (100) | 182 (100) | 1.0000 |
| 1min after induction |  |  |  |
| 0 | 181 (99) | 182 (100) | 0.1579 |
| 1 | 2 (1) | 0 (0) |  |
| 2min after induction |  |  |  |
| 0 | 181 (99) | 182 (100) | 0.1579 |
| 1 | 2 (1) | 0 (0) |  |
| 3min after induction |  |  |  |
| 0 | 180 (99) | 182 (100) | 0.1567 |
| 1 | 2 (1) | 0 (0) |  |
| 4min after induction |  |  |  |
| 0 | 166 (99) | 176 (100) | 0.1472 |
| 1 | 2 (1) | 0 (0) |  |
| 5min after induction |  |  |  |
| 0 | 137 (99) | 136 (100) | 0.1611 |
| 1 | 2 (1) | 0 (0) |  |
| 10min after induction |  |  |  |
| 0 | 40 (98) | 48 (100) | 0.2793 |
| 1 | 1 (2) | 0 (0) |  |
| 15min after induction |  |  |  |
| 0 | 14 (100) | 20 (100) | 1.0000 |
| 20min after induction |  |  |  |
| 0 | 6 (100) | 6 (100) | 1.0000 |
| 25min after induction |  |  |  |
| 0 | 3 (100) | 4 (100) | 1.0000 |
| End of surgery |  |  |  |
| 0 | 177 (98) | 180 (99) | 0.5550 |
| 1 | 1 (1) | 0 (0) |  |
| 3 | 1 (1) | 0 (0) |  |
| 4 | 1 (1) | 0 (0) |  |
| 5 | 1 (1) | 1 (1) |  |
| Recovery |  |  |  |
| 0 | 3 (2) | 3 (2) |  |
| 2 | 0 (0) | 1 (1) |  |
| 3 | 1 (1) | 0 (0) |  |
| 4 | 0 (0) | 1 (1) |  |
| 5 | 178 (98) | 175 (97) | 0.5568 |

Data are represented as *n* (%). MOAA/S, Modified Observer's Assessment of Alertness and Sedation; min, minutes.
